# Supplementary material for: Compositional alterations of gut microbiota in children with primary nephrotic syndrome after initial therapy
Source: PubMed Central journal article supplement (PMC6878711; doi:10.1186/s12882-019-1615-4), 2019-11-26

### Deinococcus-Thermus

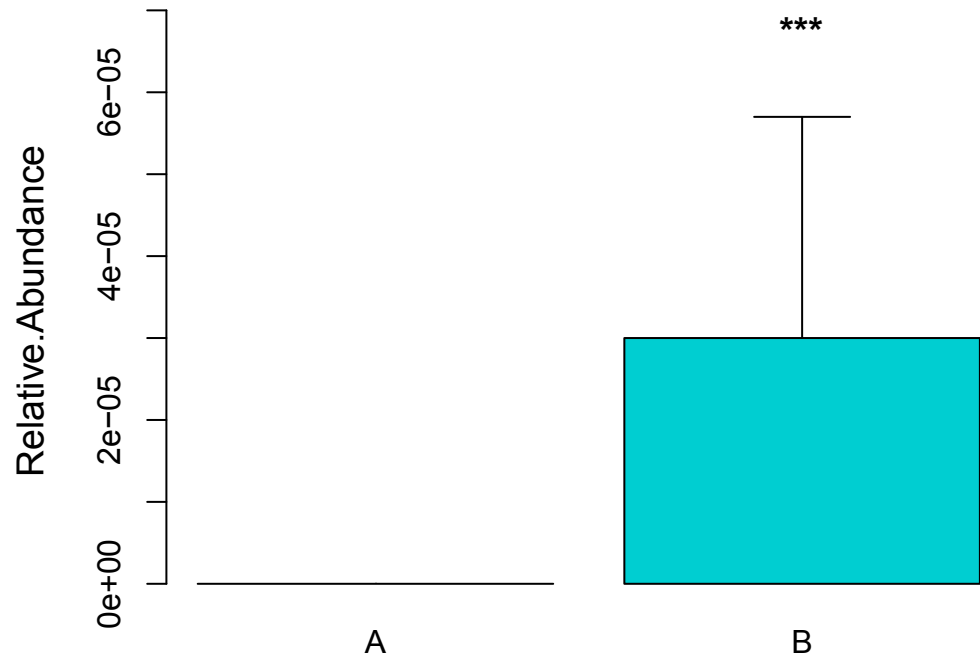

### Acidobacteria

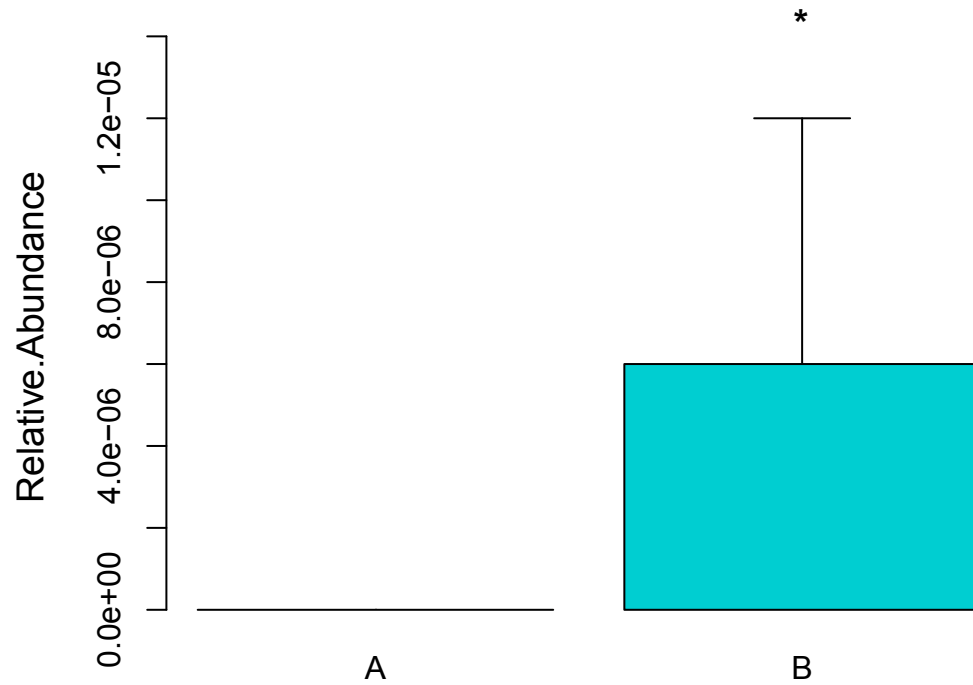

Supplement: 12882_2019_1615_MOESM2_ESM.pdf [file 12882_2019_1615_MOESM2_ESM.pdf]
