# Supplementary material for: Compositional alterations of gut microbiota in children with primary nephrotic syndrome after initial therapy
Source: Springer Nature journal article supplement (doi:10.1186/s12882-019-1615-4), 2019-11-26

**Observed**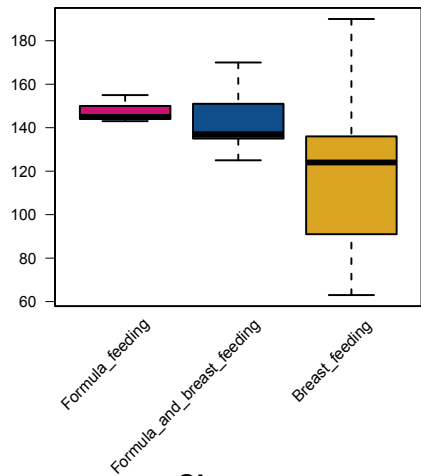**Chao1**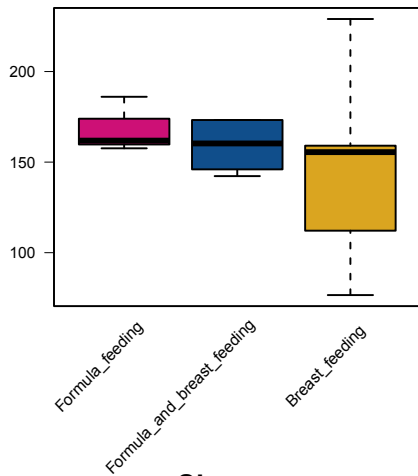**ACE**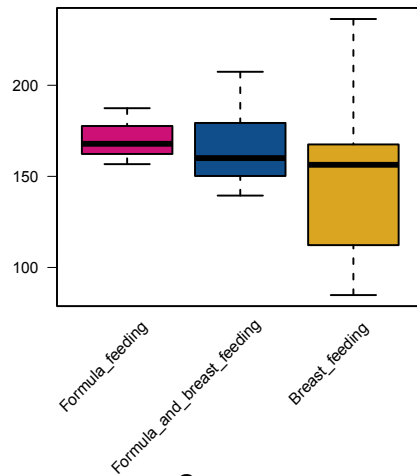**Shannon**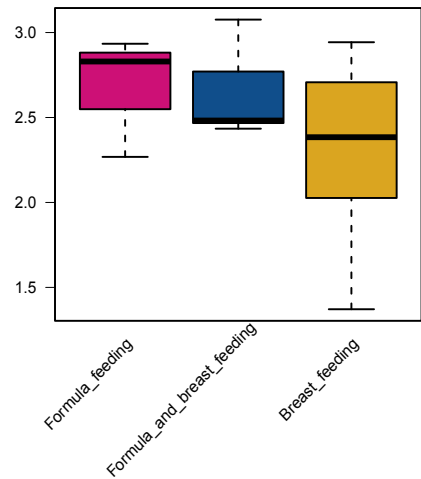**Simpson**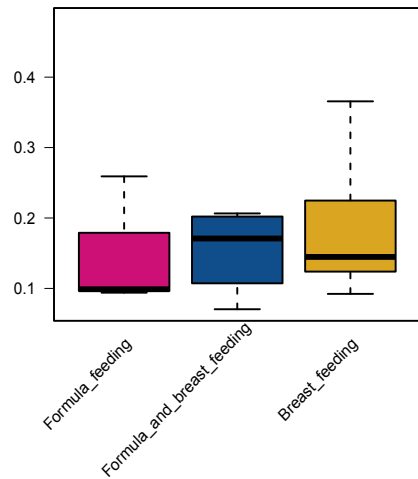**Coverage**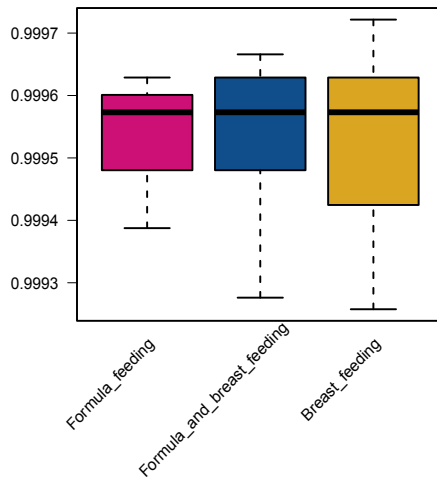

Supplement: MOESM1 [file 17435208]
